# Supplementary material for: Wnt signaling in age-related macular degeneration: human macular tissue and mouse model
Source: PubMed Central journal article supplement (PMC4609061; doi:10.1186/s12967-015-0683-x), 2015-10-17

Figure S1

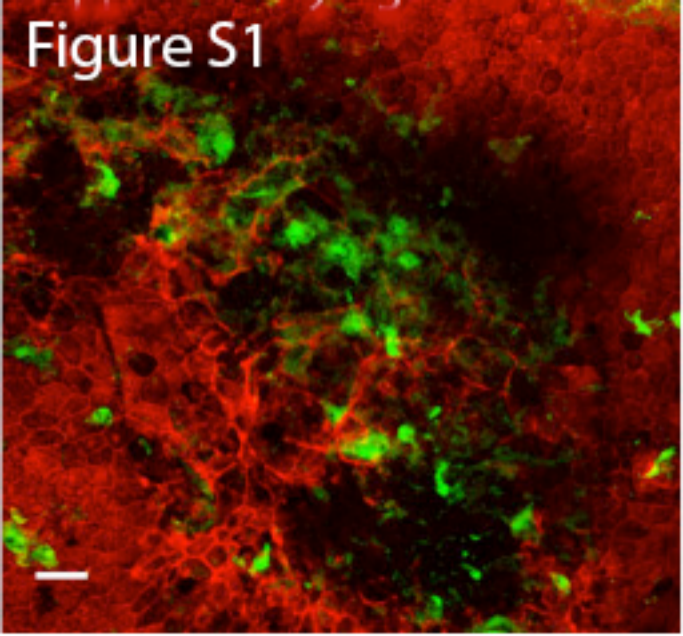

Figure S2

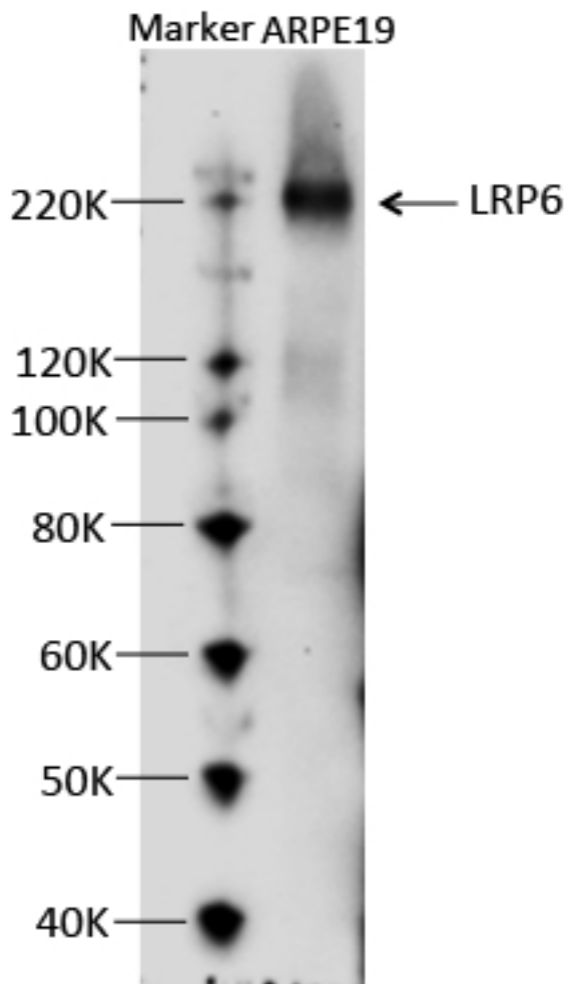

Figure S3

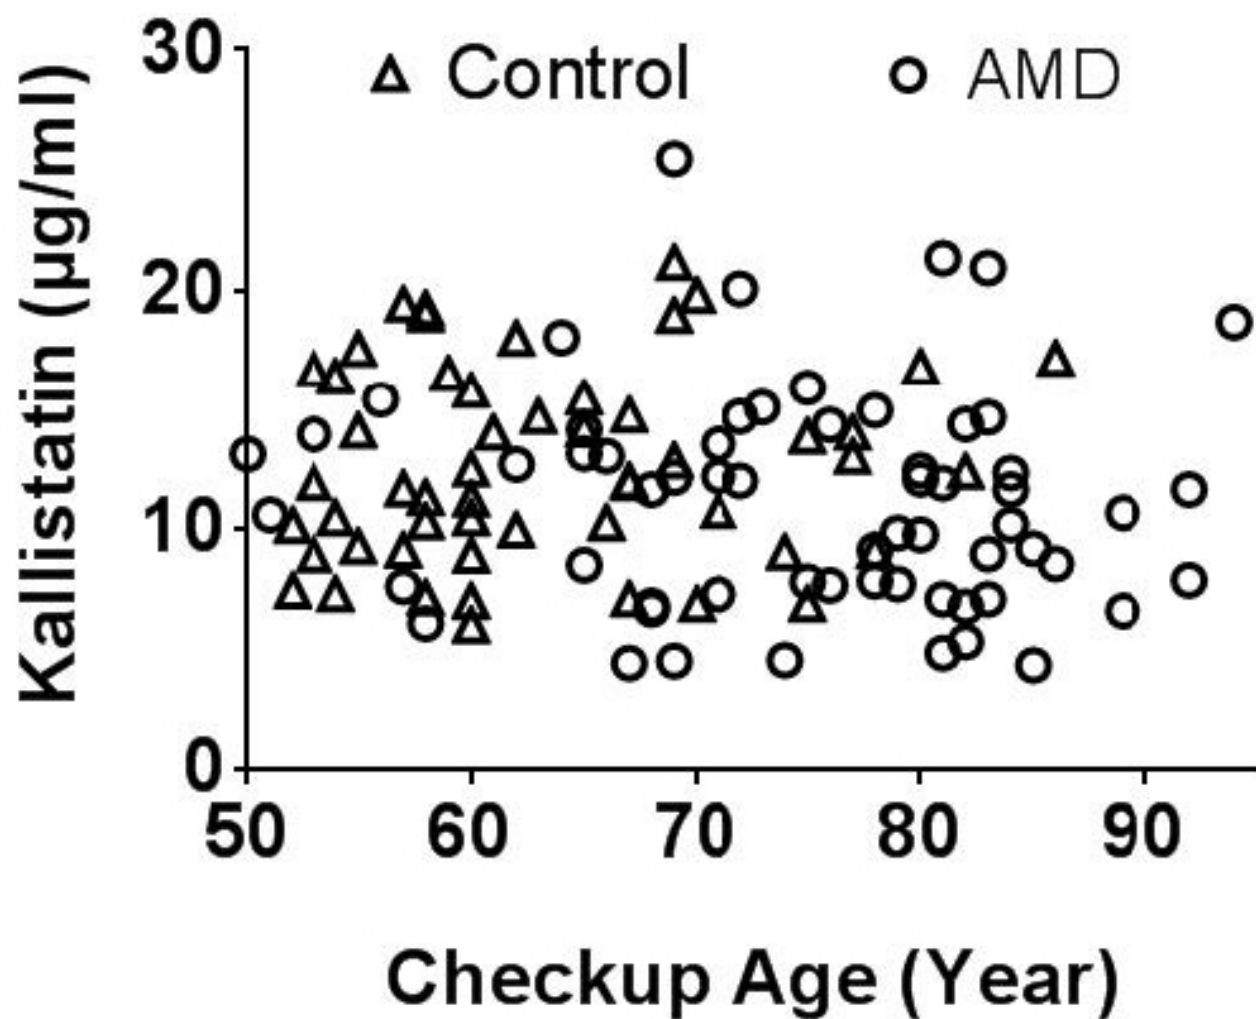

# Figure S4A

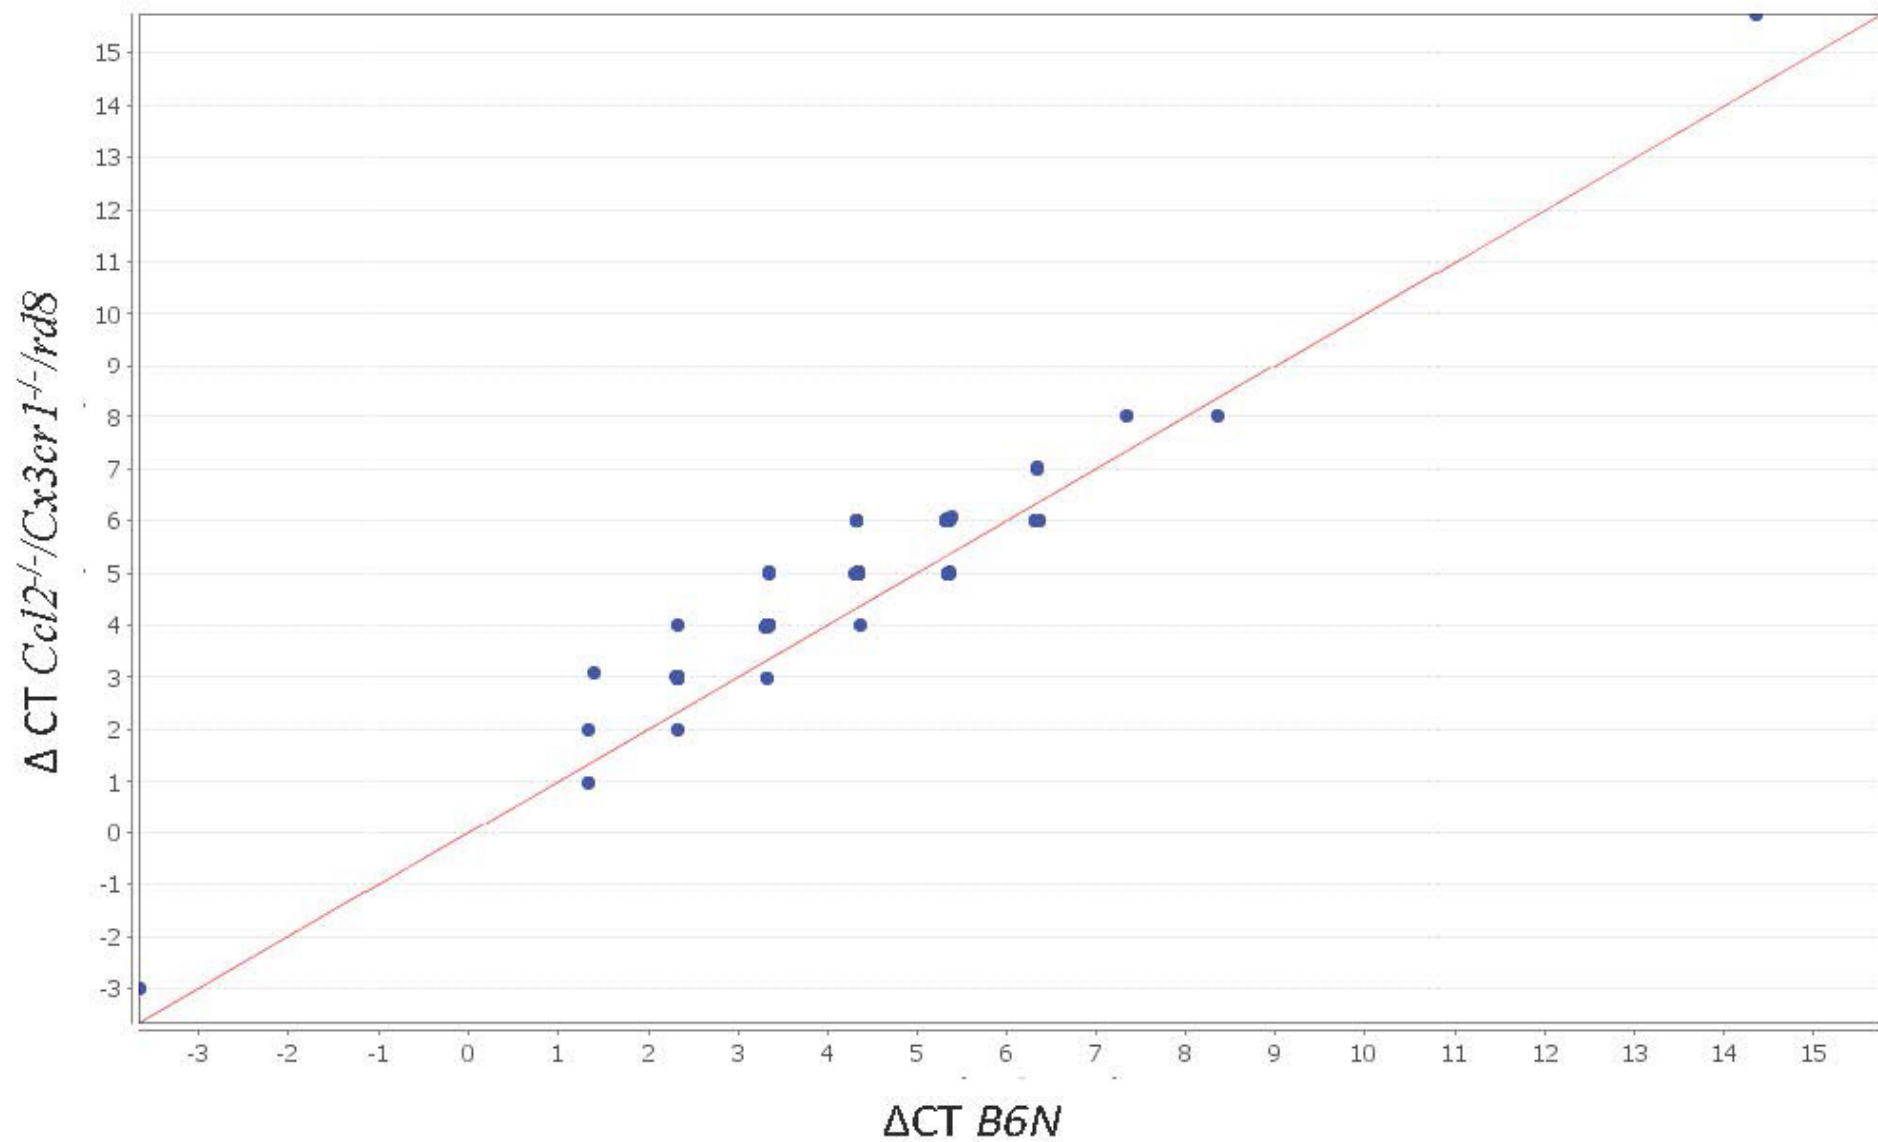

Figure S4B

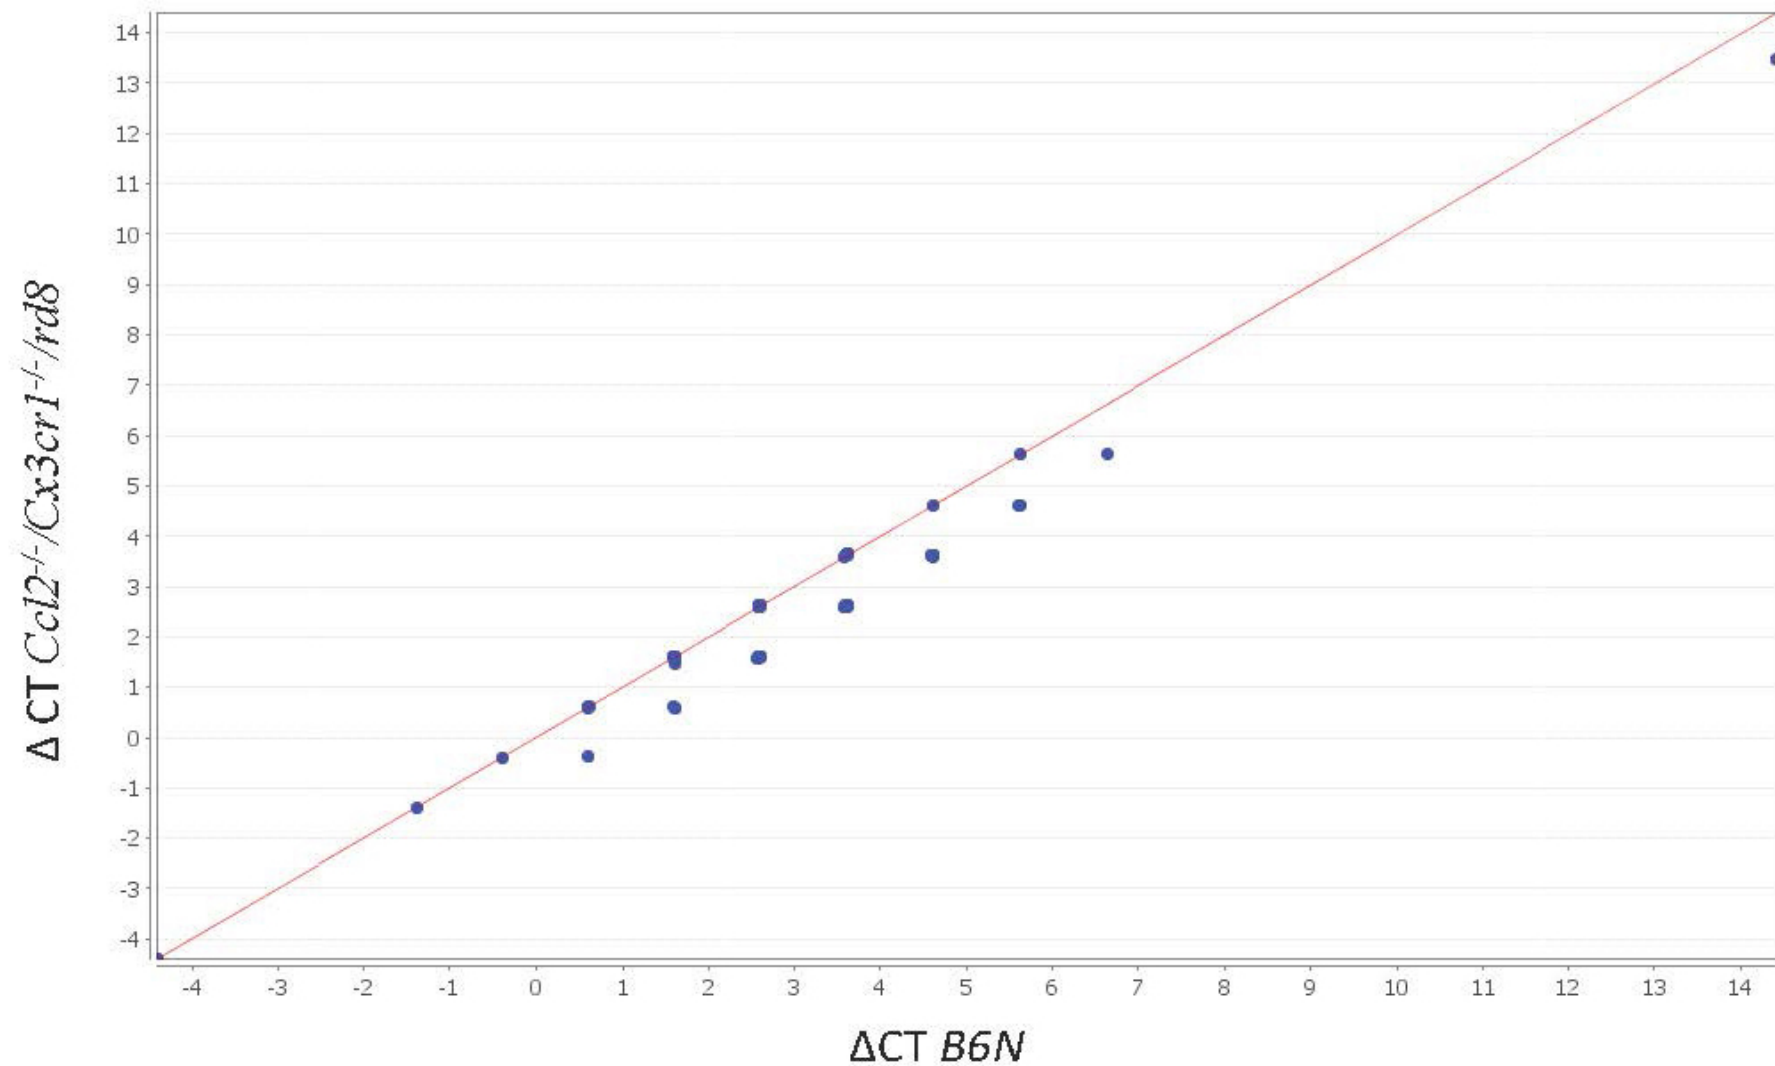

# Figure S4C

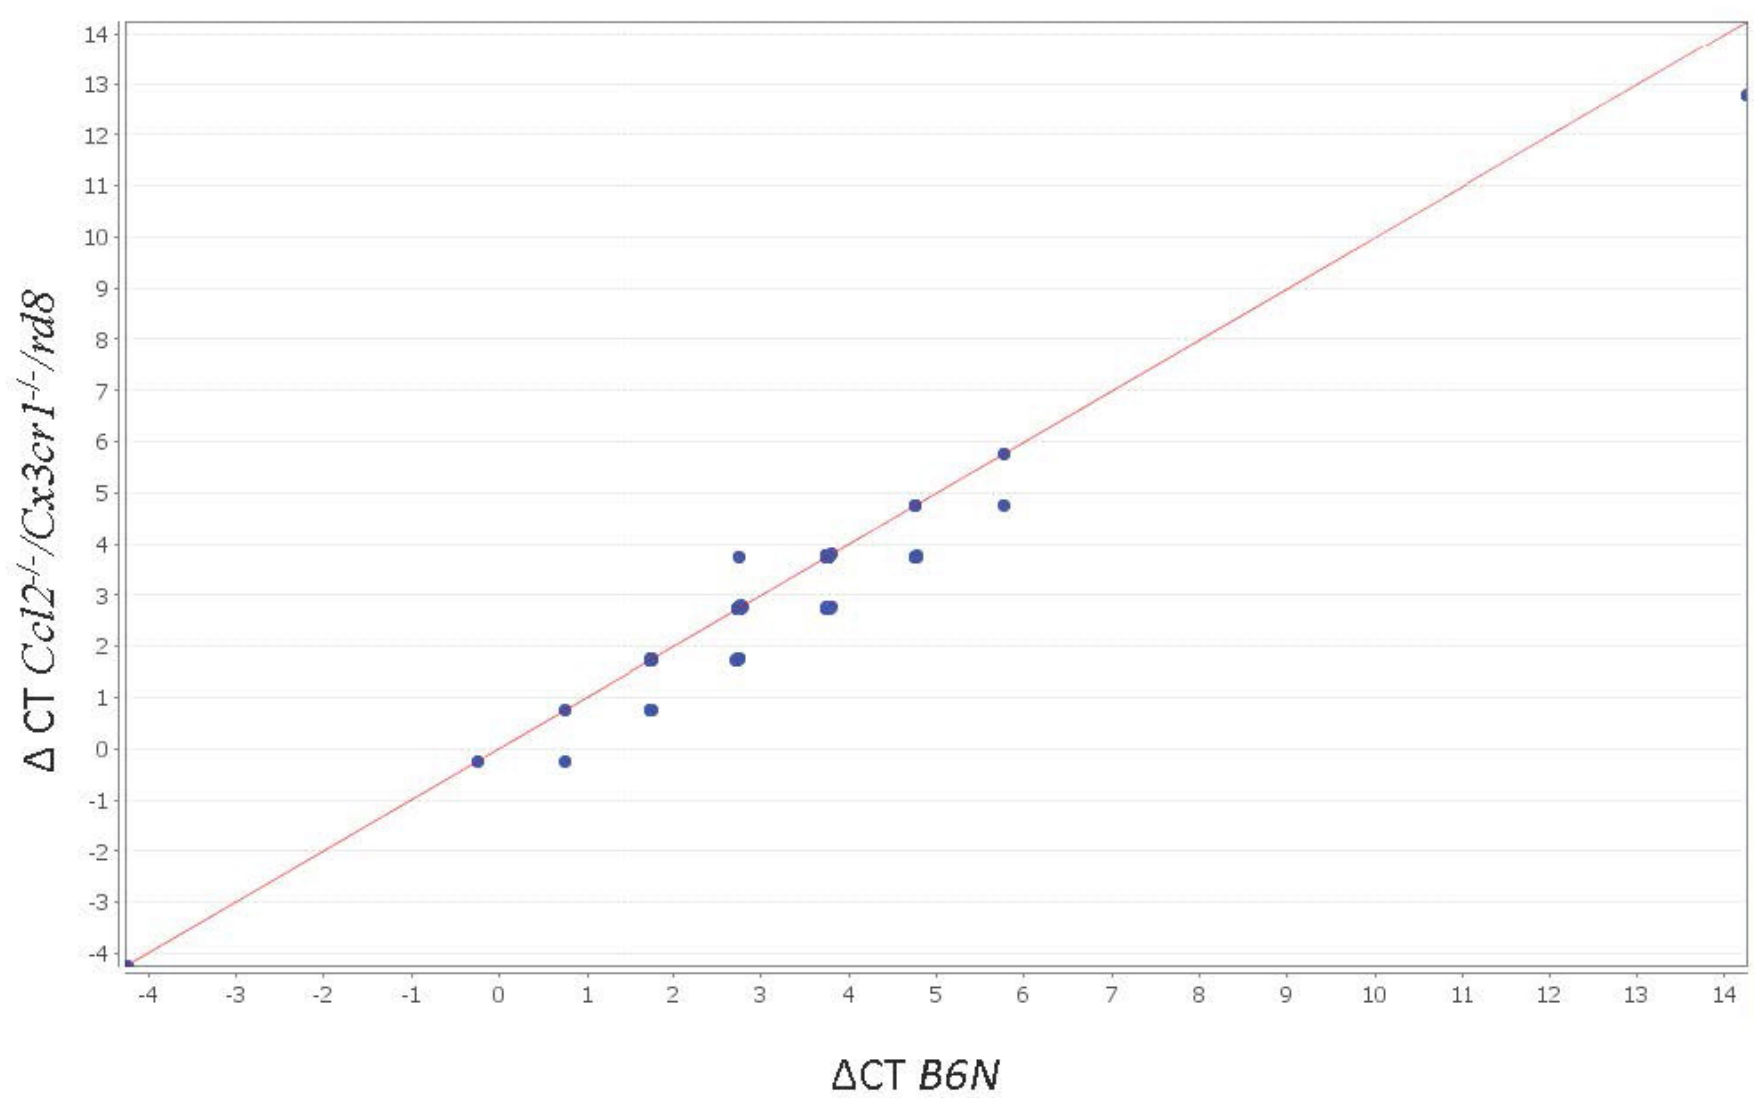

Figure S5

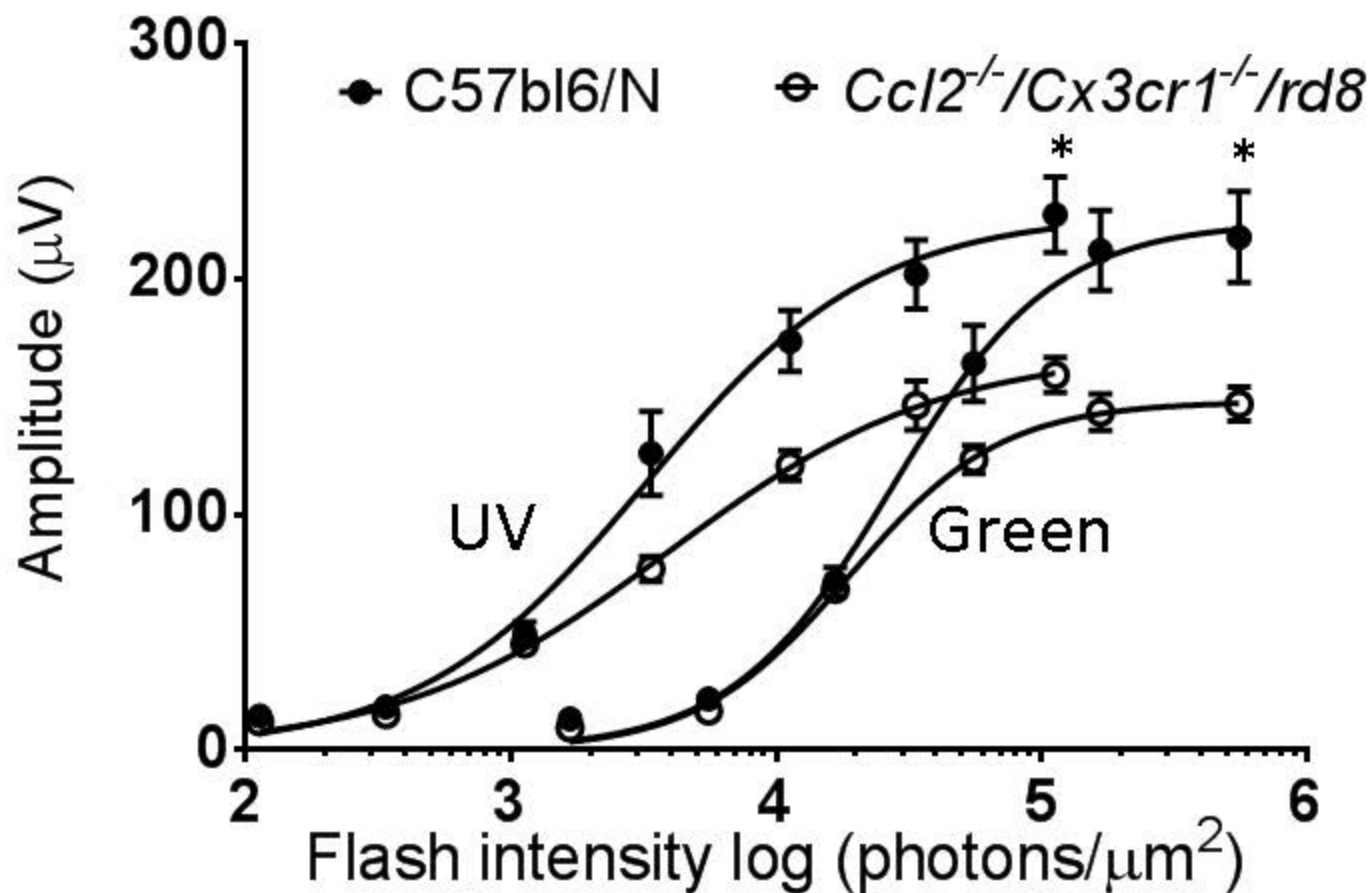

Supplement: 12967_2015_683_MOESM1_ESM.pdf [file 12967_2015_683_MOESM1_ESM.pdf]
